# Supplementary material for: Deficiency of Epithelial PIEZO1 Alleviates Liver Steatosis Induced by High-Fat Diet in Mice
Source: PubMed Central journal article supplement (PMC11705646; doi:10.7150/ijbs.102906), 2025-01-01
Supplement: ijbsv21p0745s1.pdf [file ijbsv21p0745s1.pdf]

## Supplementary Material 1

### Supplementary Table 1. Demographic characteristics of the subjects

| Characteristics                    | Control       | MASLD         | P value            |
|------------------------------------|---------------|---------------|--------------------|
| Gender, n                          |               |               |                    |
| Male                               | 7             | 9             | 0.211 <sup>a</sup> |
| Female                             | 6             | 2             |                    |
| Age, years                         |               |               |                    |
| Mean (sd)                          | 59.92 (6.60)  | 54.27 (7.90)  | 0.069 <sup>b</sup> |
| Body weight, kg                    |               |               |                    |
| Mean (sd)                          | 62.88 (11.07) | 78.77 (12.43) | 0.003 <sup>b</sup> |
| Body mass index, kg/m <sup>2</sup> |               |               |                    |
| Mean (sd)                          | 23.17 (2.41)  | 26.70 (3.18)  | 0.005 <sup>b</sup> |

a: Fisher's precision probability test

b: Student's t test

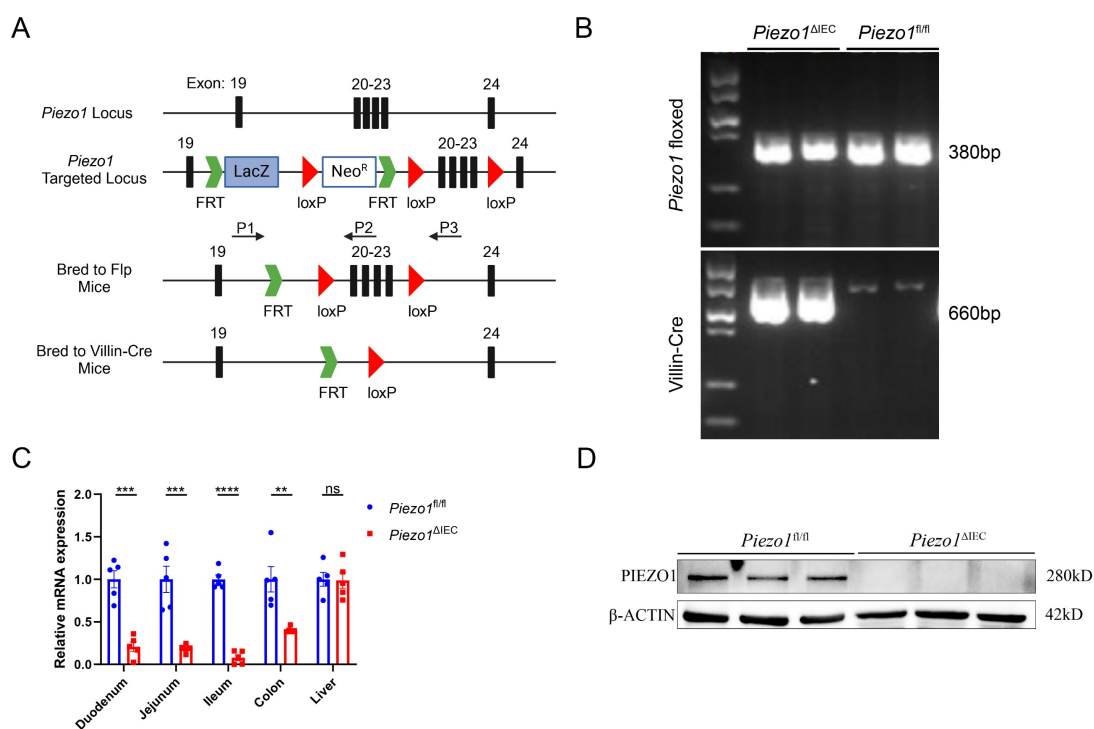

**Supplementary Figure 1. Construction and validation of *Piezo1*<sup>ΔIEC</sup> mice**

(A) Schematic diagram of construction. (B) DNA identification. (C) mRNA level of *Piezo1* in duodenum, jejunum, ileum, colon and liver, n=5/group. (D) Western blot of PIEZO1 in ileum epithelium, n=3/group.

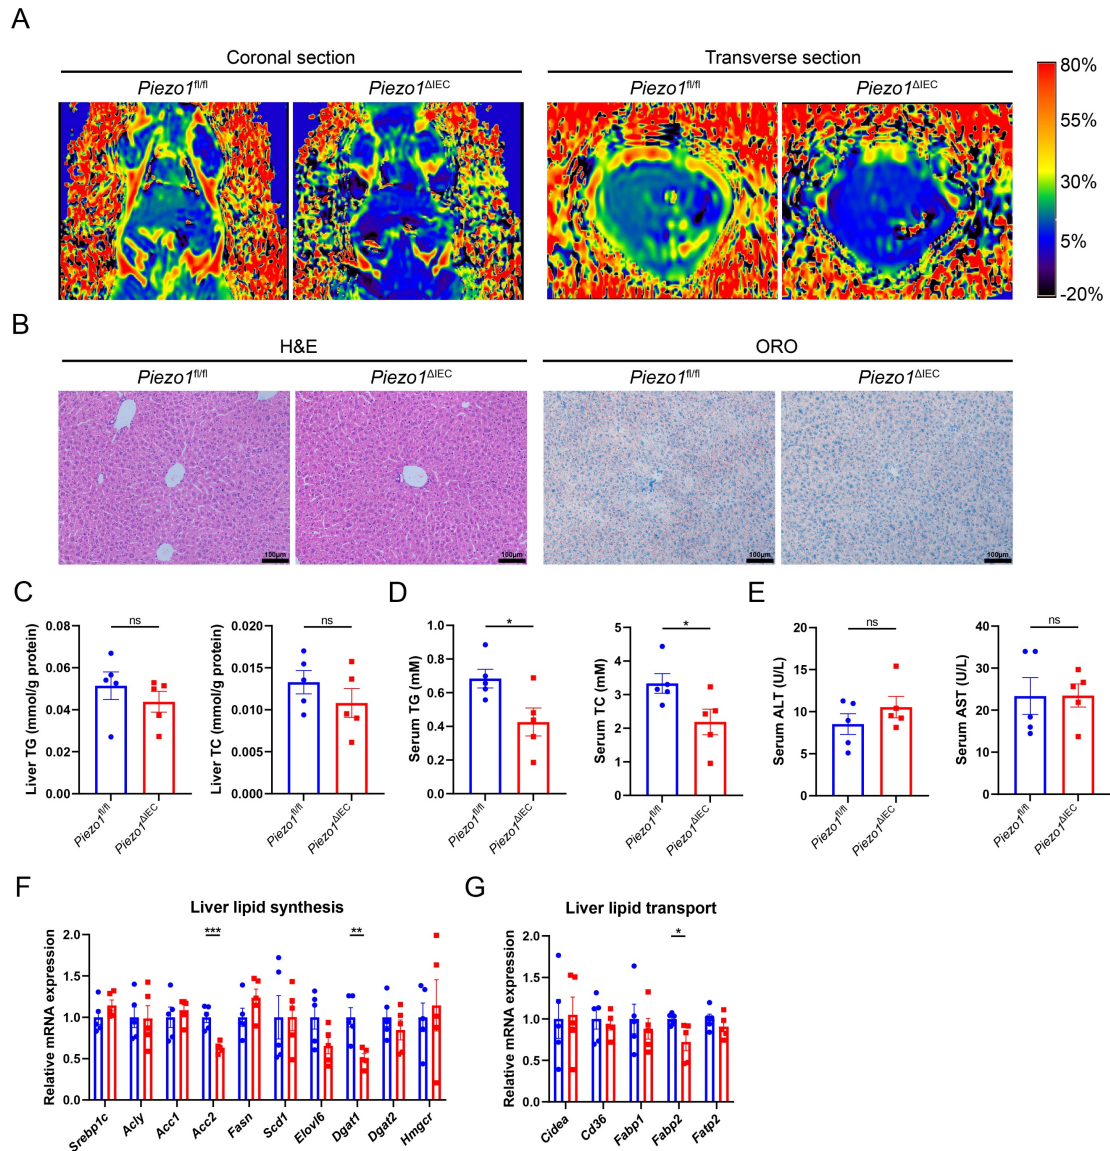

**Supplementary Figure 2. PIEZO1 deficiency in IEC did not affect liver phenotype on an NCD**

(A) Representative MRI images at coronal and transverse sections, (B) Representative liver H&E and ORO staining images, (C-E) Liver TG/TC, serum TG/ TC and serum ALT/AST level, (F-G) mRNA levels of genes associated with lipid synthesis, lipid transport and inflammation in liver, of *Piezo1<sup>fl/fl</sup>* and *Piezo1<sup>ΔIEC</sup>* mice after feeding with HFD for 12 weeks, n=5/group. Data are presented as mean ± sem. \*P < 0.05, \*\*P < 0.01, \*\*\*P < 0.001. ns, not significant.

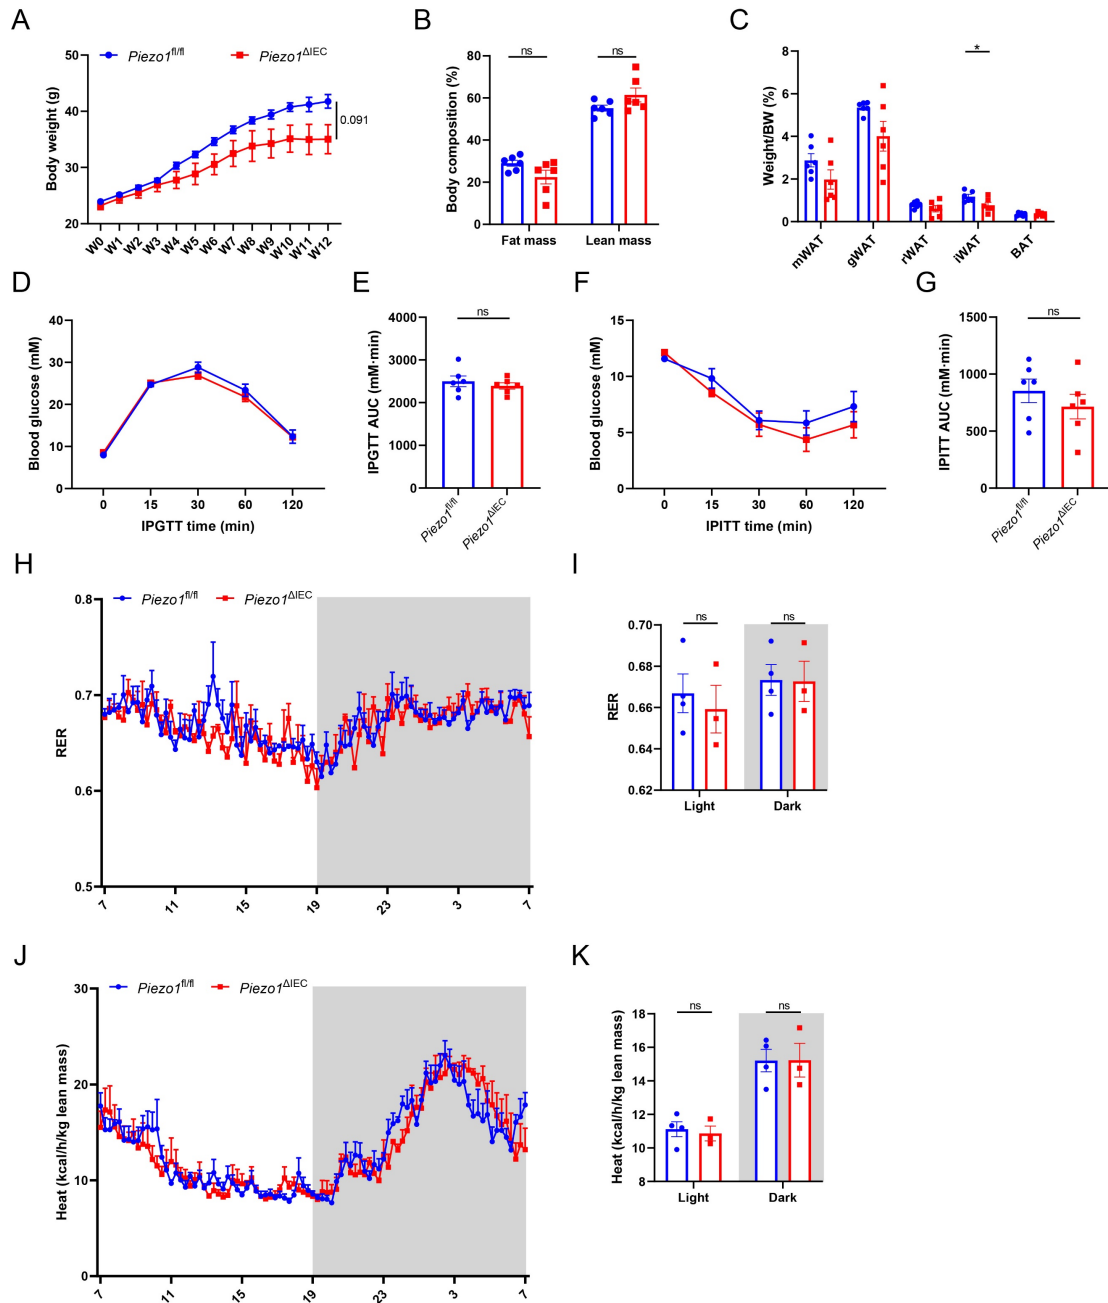

**Supplementary Figure 3. PIEZO1 deficiency did not affect glucose and energy metabolism**

(A) Body weight during 12-week HFD. (B) Body composition by MRI, (C) Relative weight of white adipose tissue (mesentery, gonad, renal and inguen) and brown adipose tissue, (D) IPGTT, (E) IPGTT AUC, (F) IPITT, (G) IPITT AUC of *Piezo1<sup>fl/fl</sup>* and *Piezo1<sup>ΔIEC</sup>* mice after feeding with 12-week HFD, n=6/group. (H-I) Respiratory exchange ratio (RER), (J-K) Heat production of *Piezo1<sup>fl/fl</sup>* and *Piezo1<sup>ΔIEC</sup>* mice fed with HFD for 11 weeks, n=3-4/group. Data are presented as mean ± sem. \*P < 0.05, \*\*P < 0.01, \*\*\*P < 0.001. ns, not significant.

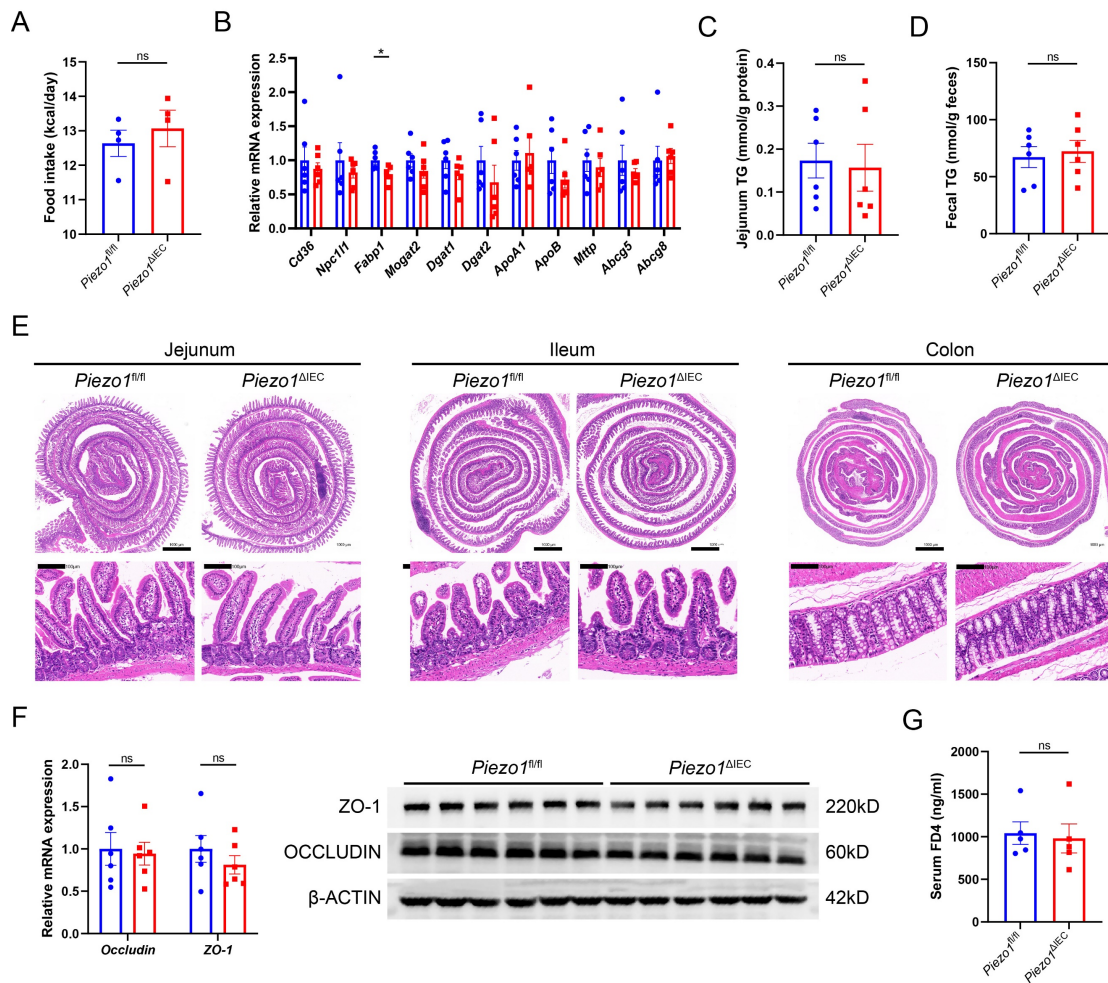

**Supplementary Figure 4. *Piezo1<sup>ΔIEC</sup>* mice did not alter intestinal lipid absorption, synthesis and barrier function**

(A) Food intake (n=4/group). (B) mRNA levels of genes associated with lipid absorption, synthesis and output in jejunum, (C) Jejunum TG content, (D) Fecal TG content, n=6/group. (E) Representative jejunum, ileum and colon H&E staining images of *Piezo1<sup>fl/fl</sup>* and *Piezo1<sup>ΔIEC</sup>* mice after feeding with 12-week HFD, scale bar: 1000μm, 100μm. (F) mRNA levels (left, n=6/group) and western blot image (right, n=3/group) of Occludin and ZO-1. (G) Serum FD4 concentration at 4 h after FD4 gavage in 0.75mg/g of body, n=5/group. Data are presented as mean ± sem. \*P < 0.05, \*\*P < 0.01, \*\*\*P < 0.001. ns, not significant.

A

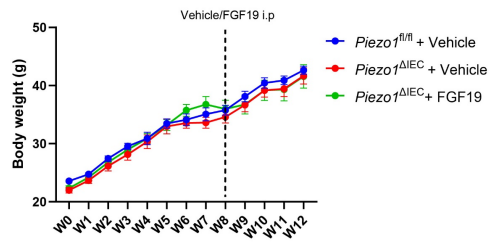

B

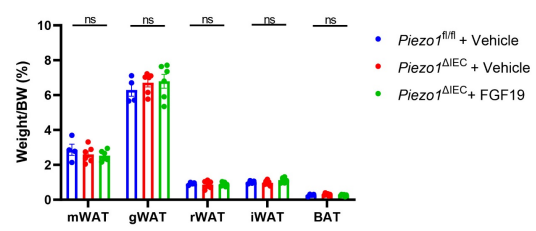

**Supplementary Figure 5. Exogenous FGF19 did not alter weight of body or adipose tissues on *Piezo1<sup>ΔIEC</sup>* mice**

(A) Body weight during 12-week HFD. (B) Relative weight of white adipose tissue (mesentery, gonad, renal and inguen) and brown adipose tissue, of 3 group mice after feeding with HFD for 12 weeks, n=6/group. Data are presented as mean  $\pm$  sem. \*P < 0.05, \*\*P < 0.01, \*\*\*P < 0.001. ns, not significant.

## Supplementary Material 2

### 1. Targeted metabolomics of bile acids (BAs)

#### (1) Chemicals and Reagents

All BAs standards were purchased from Steraloids (Newport, RI, USA) and TRC Chemicals (Toronto, ON, Canada), as well as synthesized by Metabo-Profile (Shanghai, China). The 10 isotope labeled BAs internal standards were purchased from C/D/N Isotops (Quebec, Canada) and Steraloids (Newport, RI, USA).

Analytical pure ammonium acetate was purchased from Sigma Aldrich (St. Louis, MO, USA). Chromatographic pure methanol, isopropanol, acetonitrile, glacial acetic acid, and formic acid were purchased from Thermo Fisher Scientific (FairLawn, NJ, USA). Ultra-pure water is produced by the Mill-Q ultra-pure water system (Millipore, Billerica, MA) equipped with LC-MS Pak filter membranes.

#### (2) Sample Preparation

10mg cecal contents, pre cooled grinding beads and 200 $\mu$ l acetonitrile/methanol (v/v=8:2) mixed solvent containing 10 $\mu$ l internal standards were added into a centrifuge tube. After homogenization, the tube was centrifuged at 13500 rpm for 20 minutes at 4°C. 10 $\mu$ l supernatant was diluted with 90 $\mu$ l mixed solution composed by acetonitrile/methanol (80/20) and ultrapure water (1:1). After shaking and centrifuging, 5 $\mu$ l solution was injected for analysis.

#### (3) Instrumentation

Ultra-high performance liquid chromatography tandem mass spectrometry (UPLC-MS/MS, ACQUITY UPLC-Xevo TQ-S, Waters Corp., Milford, MA, USA) was used to quantify BAs concentration in cecal contents. The optimized instrument settings are briefly described below.

| UPLC-MS/MS instrument settings |                                                                                                                                                              |
|--------------------------------|--------------------------------------------------------------------------------------------------------------------------------------------------------------|
| UPLC                           |                                                                                                                                                              |
| Column                         | ACQUITY UPLC Cortecs C18 1.6 $\mu$ M VanGuard pre-column (2.1 $\times$ 5 mm)<br>ACQUITY UPLC Cortecs C18 1.6 $\mu$ M analytical column (2.1 $\times$ 100 mm) |
| Column Temp (°C)               | 30                                                                                                                                                           |

|                             |                                                                                               |
|-----------------------------|-----------------------------------------------------------------------------------------------|
| Sample Manager Temp (°C)    | 10                                                                                            |
| Mobile Phases               | A=water with formic acid (pH =3.25); and B=acetonitrile / methanol (80:20)                    |
| Gradient Conditions         | 0-1 min (5% B), 1-3 min (5-30% B), 3-15 min (30-100% B), 15-16 min (100-5%B), 16-17 min (5%B) |
| Flow Rate (mL/min)          | 0.40                                                                                          |
| Injection Vol (μl)          | 5.0                                                                                           |
| <b>Mass Spectrometer</b>    |                                                                                               |
| Capillary (Kv)              | 2.0 (ESI-)                                                                                    |
| Ion Source Temp (°C)        | 150                                                                                           |
| Desolvation Temp (°C)       | 550                                                                                           |
| Desolvation Gas Flow (L/Hr) | 1000                                                                                          |

#### (4) Quality control and analysis of data

Three types of quality control samples including test mixtures, internal standards, and pooled biological samples are routinely used. Raw data was processed by QuanMET software v1.0 (Metabo-Profile, Shanghai, China), which established standard curves, and quantifies each BAs.

## **2. Measurement of retinol and all-trans retinoic acid**

### (1) Chemicals and Reagents

Mass spectrometry pure methanol, acetonitrile, formic acid and hexane were purchased from Thermo Fisher Scientific (FairLawn, NJ, USA). Analytical pure ammonium acetate was purchased from Sigma Aldrich (St. Louis, MO, USA). Ultra-pure water is produced by the Mill-Q ultra-pure water system (Millipore, Billerica, MA) equipped with LC-MS Pak filter membranes. Standard mother liquor was diluted with 50% methanol solution to obtain standard samples in different concentration and make the standard curve.

### (2) Sample Preparation

15mg ileum and 5μl deionized water were mixed to homogenize. Then 100μl working fluid containing internal standards were added and homogenized for 10 minutes. Sucked 100μl supernatant, transferred to a 2ml glass vial, and then added 10μl hydrochloric acid (4mol/L). After capping, vibrated the vial for 30 seconds, added 800μl hexane, placed on a thermostatic oscillator and extracted at 2000rpm for 15

minutes at room temperature (MSC-100, Allsheng Instruments Co.,Ltd., Hangzhou, China). After centrifuging at 4000g for 20 minutes, 690µl supernatant was transferred to 2ml vial and air-dried. After dissolved by 50µl acetonitrile, the sample was be ready for test and analysis.

### (3) Instrumentation

Ultra-high performance liquid chromatography tandem mass spectrometry (ACQUITY-I Xevo TQ-S, Waters Corp., Milford, MA, USA) was used to quantify retinol and all-trans retinoic acid concentration in ileum.

| <b>UPLC-MS/MS instrument settings</b> |                                                                                                                                                    |
|---------------------------------------|----------------------------------------------------------------------------------------------------------------------------------------------------|
| <b>UPLC</b>                           |                                                                                                                                                    |
| Column                                | Atlantis Premier BEH C18 AX 1.7 µM analytical column (2.1 × 100 mm)                                                                                |
| Column Temp (°C)                      | 40                                                                                                                                                 |
| Sample Manager Temp (°C)              | 10                                                                                                                                                 |
| Mobile Phases                         | A=0.1% formic acid; and B=0.1% formic acid methanol                                                                                                |
| Gradient Conditions                   | 0-2min (0-80% B), 2-3min (80% B), 3-4min (80-90%B), 4-5.5 min (90% B), 5.5-7 min (90-100% B), 7-9.5min (100%B), 9.5-11min (100-0%B),11-12min (0%B) |
| Flow Rate (mL/min)                    | 0.3                                                                                                                                                |
| Injection Vol (µl)                    | 10                                                                                                                                                 |
| <b>Mass Spectrometer</b>              |                                                                                                                                                    |
| Capillary (Kv)                        | 3.0 (ESI+)                                                                                                                                         |
| Ion Source Temp (°C)                  | 150                                                                                                                                                |
| Desolvation Temp (°C)                 | 500                                                                                                                                                |
| Desolvation Gas Flow (L/Hr)           | 1000                                                                                                                                               |

### (4) Quality control and analysis of data

The samples were thawed slowly on the ice bath, and the reagent used for extraction was pre-frozen and stored in the refrigerator at -20°C. Whole sample preparation process was completed as soon as possible. There were reagent blank samples and mixed quality control samples before and after the sample analysis of each batch. Raw data was processed by MassLynx software (v4.1, Waters, Milford, MA,USA) to quantifies retinol and all-trans retinoic acid.

## **3. Real-time quantitative polymerase chain reaction (RT-qPCR)**



|                               | Forward (5'-3' sequence)  | Reverse (5'-3' sequence) |
|-------------------------------|---------------------------|--------------------------|
| <b>Mouse</b>                  |                           |                          |
| <i>Gapdh</i>                  | AGGTCGGTGTGAACGGATTTG     | TGTAGACCATGTAGTTGAGGTCA  |
| <i>Piezol</i>                 | AGGTGGTCAGTGTGATGCC       | ATCCGCCCTCATCAAGTGG      |
| <i>Srebp1c</i>                | GATGTGCGAACTGGACACAG      | CATAGGGGGCGTCAAACAG      |
| <i>Acly</i>                   | ACCCTTTCAGTGGGGATCACA     | GACAGGGATCAGGATTCCTTG    |
| <i>Acc1</i>                   | CAGTAACCTGGTGAAGCTGGA     | GCCAGACATGCTGGATCTCAT    |
| <i>Acc2</i>                   | CCTTTGGCAACAAGCAAGGTA     | AGTCGTACACATAGGTGGTCC    |
| <i>Fasn</i>                   | AAGCGGTCTGGAAAGCTGAA      | AGGCTGGGTGATACCTCCA      |
| <i>Scd1</i>                   | TTCTTGCATACTCTGGTGC       | CGGGATTGAATGTTCTTGTCGT   |
| <i>Elovl6</i>                 | GAAAAGCAGTTCAACGAGAACG    | AGATGCCGACCACCAAAGATA    |
| <i>Dgat1</i>                  | TCCGTCCAGGGTGGTAGTG       | TGAACAAAGAATCTTGCAGACGA  |
| <i>Dgat2</i>                  | GCGCTACTTCCGAGACTACTT     | GGGCCTTATGCCAGGAAACT     |
| <i>Hmgcr</i>                  | AGCTTGCCCCGAATTGTATGTG    | TCTGTTGTGAACCATGTGACTTC  |
| <i>Cidea</i>                  | TGACATTCATGGGATTGCAGAC    | GGCCAGTTGTGATGACTAAGAC   |
| <i>Cd36</i>                   | CCAAATGAAGATGAGCATAGGACAT | GTTGACCTGCAGTCGTTTTGC    |
| <i>Fabp1</i>                  | ATGAACTTCTCCGGCAAGTACC    | CTGACACCCCCTTGATGTCC     |
| <i>Fabp2</i>                  | GTGGAAAGTAGACCGGAACGA     | CCATCCTGTGTGATTGTCAGTT   |
| <i>Fatp2</i>                  | GATGCCGTGTCCGTCTTTTAC     | GACTTCAGACCTCCACGACTC    |
| <i>Il-1<math>\beta</math></i> | GAAATGCCACCTTTTGACAGTG    | TGGATGCTCTCATCAGGACAG    |
| <i>Il-6</i>                   | TAGTCCTTCCTACCCCAATTTCC   | TTGGTCCTTAGCCACTCCTTC    |
| <i>Tnfa</i>                   | CCCTCACACTCAGATCATCTTCT   | GCTACGACGTGGGCTACAG      |
| <i>Ccl2</i>                   | CAGCAGGTGTCCCAAAGAAG      | TTCCGATCCAGGTTTTTAAT     |
| <i>Ccl3</i>                   | TGTACCATGACACTCTGCAAC     | CAACGATGAATTGGCGTGGAA    |
| <i>F4/80</i>                  | AATCGTGCTGGTTGAATACAG     | CCAGGCAAGGAGGACAGAGTT    |
| <i>Npc1l1</i>                 | TGTCCCCGCCTATACAATGG      | CCTTGGTGATAGACAGGCTACTG  |
| <i>Mogat2</i>                 | TGGGAGCGCAGGTTACAGA       | CAGGTGGCATAACAGGACAGA    |
| <i>ApoA1</i>                  | AGCAAGATGAACCCAGTCC       | CACATAGTCTCTGCCGCTGT     |
| <i>ApoB</i>                   | TTGGCAAACATGCATAGCATCC    | TCAAATTGGGACTCTCCTTTAGC  |
| <i>Mttp</i>                   | AGCCAGTGGGCATAGAAAATC     | GGTCACTTTACAATCCCAGAG    |
| <i>Abcg5</i>                  | AGGGCCTCACATCAACAGAG      | GCTGACGCTGTAGGACACAT     |
| <i>Abcg8</i>                  | CTGTGGAATGGGACTGTACTTC    | GTTGGACTGACCACTGTAGGT    |
| <i>Zo-1</i>                   | GGGAAAACCCGAAACTGATG      | GCTGTACTGTGAGGGCAACG     |
| <i>Occludin</i>               | CCCAGGCTTCTGGATCTATGT     | TCCATCTTTCTTCGGGTTTTCA   |
| <i>Fxr</i>                    | TCCACAACCAAGTTTTGCAG      | TCTCTGTTTGTGTACGAATCCA   |
| <i>Shp</i>                    | TCTGCAGGTCGTCCGACTATTC    | AGGCAGTGGCTGTGAGATGC     |
| <i>Fgf15</i>                  | GAGGACCAAACGAACGAAATT     | ACGTCCTTGATGGCAATCG      |

|                |                          |                          |
|----------------|--------------------------|--------------------------|
| <i>Cyp7a1</i>  | AACAACCTGCCAGTACTAGATAGC | GTGTAGAGTGAAGTCCTCCTTAGC |
| <i>Cyp8b1</i>  | ACAGCGTGATGGAGGAGAGT     | AGGGGAAGAGAGCCACCTTA     |
| <i>Cyp7b1</i>  | TGAGGTTCTGAGGCTGTGC      | TGGAGGAAAGAGGGCTACAA     |
| <i>Cyp27a1</i> | CCAGGCACAGGAGAGTACG      | GGGCAAGTGCAGCACATAG      |
| <i>Lrat</i>    | GGAACAACCTGCGAACACTTTG   | CCAGACATCATCCACAAGCA     |
| <i>Adh1</i>    | AAGACTACAGCAAACCCATCC    | GACGACGCTTACACCACAT      |
| <i>Adh6a</i>   | GTGCAAGTTGAGCCACCGA      | CACCACGAGTTCTCCTTTCAG    |
| <i>Rdh1</i>    | GTCATGGGCCGAATGTCTTTC    | CACAAGTCTTGAAGCCTCCAG    |
| <i>Rdh7</i>    | TGGGTCGAGTGTCTTTGTGTG    | AACCCGCCAGGCTCTATGATA    |
| <i>Rdh10</i>   | GAACATCGTAGTGGAGTTCTTCG  | CGGTCTCCTCATTGCTCTGC     |
| <i>Rdh13</i>   | ATACCTGGGAAGACTGTTATCGT  | TGACCAGAATGTCTACTCGCT    |
| <i>Aldh1a1</i> | CTCCTGGCGTGGTAAACATT     | CCATGGTGTGCAAACCTCAAC    |
| <i>Aldh1a2</i> | TGGGTGAGTTTGGCTTACGG     | AGAAACGTGGCAGTCTTGGC     |
| <i>Aldh1a3</i> | ATCAAACCCACGGTCTTCTC     | TTTGTCCAGGTTTTTGGTGA     |
| Human          |                          |                          |
| <i>GAPDH</i>   | GTCTCCTCTGACTTCAACAGCG   | ACCACCCTGTTGCTGTAGCCAA   |
| <i>PIEZO1</i>  | GGACTCTCGCTGGTCTACCT     | GGGCACAATATGCAGGCAGA     |
| <i>FXR</i>     | GACTTTGGACCATGAAGACCAG   | GCCCAGACGGAAGTTTCTTATT   |
| <i>SHP</i>     | TTCAACCCCGATGTGCCAG      | AAGAAGGCCAGCGATGTCAA     |
| <i>FGF19</i>   | ACATGCCTCCCCATGGATTG     | AAGTGCTGGGGAAAGGGTTC     |
